# Supplementary material for: Nano-NiCuZnCo2O4: a promising catalyst for the fast thermal decomposition of ammonium nitrate (AN) in an energetic formulation
Source: Royal Society of Chemistry journal article supplement (doi:10.1039/d2nj03326g), 2022-01-01
Supplement: d2nj03326g1.pdf [file d2nj03326g1.pdf]

## **Nano-NiCuZnCo<sub>2</sub>O<sub>4</sub>, a promising catalyst for fast thermal decomposition of ammonium nitrate (AN) in energetic formulation**

**Pragnesh N Dave<sup>a\*</sup> and Ruksana Sirach<sup>a</sup>**

<sup>a</sup> Department of Chemistry, Sardar Patel University, Vallabh Vidyanagar, 388 120, Gujarat, India

\*Corresponding Author Email: Pragnesh7@yahoo.com

### **Supplementary file**

Table S1. The concentration of metal ions in NiCuZnCo<sub>2</sub>O<sub>4</sub> (ICP-OES elemental analysis; Optima 8000; Perkin Elmer).

| Metal ions                        | Ni  | Cu  | Zn  | Co |
|-----------------------------------|-----|-----|-----|----|
| Percent content of metal ions (%) | 8.0 | 8.7 | 8.9 | 48 |
